# Supplementary material for: Regulatory mechanism of phosphorus supply intensity on the plant nitrogen acquisition in soybean: Insight from the differences of rhizobia diversity between high-oil soybean and non-high-oil soybean
Source: Research Square preprint supplement (doi:10.21203/rs.3.rs-8195203/v1), 2025-12-16
Supplement: Supplementary file 1 [file 36867bf8e1f7e1282d2f1529.xlsx]

## Sheet: soil pH
Treatment	Phosphorus supply intensity	Variety	pH
			RS	NRS
T1	0kg·hm-2	KN18	6.38±0.03Aa	6.47±0.05ABab
T2	35kg·hm-2	KN18	6.38±0.03Aab	6.48±0.01Aa
T3	70kg·hm-2	KN18	6.37±0.01Ab	6.41±0.03ABc
T4	105kg·hm-2	KN18	6.34±0.05Ab	6.40±0.06Ba
T5	140kg·hm-2	KN18	6.35±0.04Aa	6.40±0.01Bb
T6	0kg·hm-2	KN39	6.47±0.04Ab	6.51±0.05ABab
T7	35kg·hm-2	KN39	6.33±0.02Bb	6.46±0.03BCa
T8	70kg·hm-2	KN39	6.46±0.02Aa	6.54±0.02Aa
T9	105kg·hm-2	KN39	6.38±0.01Bab	6.46±0.03BCa
T10	140kg·hm-2	KN39	6.36±0.03Ba	6.42±0.02Cb
T11	0kg·hm-2	BR43	6.44±0.04Aa	6.53±0.03Aa
T12	35kg·hm-2	BR43	6.40±0.02ABa	6.50±0.02ABa
T13	70kg·hm-2	BR43	6.39±0.02ABb	6.48±0.02ABb
T14	105kg·hm-2	BR43	6.39±0.05ABab	6.48±0.05ABa
T15	140kg·hm-2	BR43	6.35±0.02Ba	6.45±0.03Ba
T16	0kg·hm-2	LK310	6.37±0.02ABb	6.44±0.02Bb
T17	35kg·hm-2	LK310	6.41±0.03Aa	6.49±0.02ABa
T18	70kg·hm-2	LK310	6.33±0.02Bc	6.51±0.03Aab
T19	105kg·hm-2	LK310	6.42±0.01Aa	6.46±0.04BCa
T20	140kg·hm-2	LK310	6.35±0.05Ba	6.47±0.02ABCa

## Sheet: soil EC
Treatment	Phosphorus supply intensity	Variety	EC
			RS	NRS
T1	0kg·hm-2	KN18	356.66±2.51Ac	404±5Bc
T2	35kg·hm-2	KN18	362.33±1.52Aa	415±3Ab
T3	70kg·hm-2	KN18	345±2Ab	366±2.65Cc
T4	105kg·hm-2	KN18	314.33±5.51Bc	358.66±1.53Db
T5	140kg·hm-2	KN18	335.66±4.16Aa	361±CDd
T6	0kg·hm-2	KN39	405±4Db	419.66±Bb
T7	35kg·hm-2	KN39	325±4Ba	408.33±Cc
T8	70kg·hm-2	KN39	407±4.58Aa	448.33Aa
T9	105kg·hm-2	KN39	368±6.55Bc	354.33±Db
T10	140kg·hm-2	KN39	343.33±4.04Aa	407±Cb
T11	0kg·hm-2	BR43	375.33±5.03Cb	436.333±Aa
T12	35kg·hm-2	BR43	364.66±4.51Cd	427.33±Ba
T13	70kg·hm-2	BR43	356.33±4.51Db	417.67±Cb
T14	105kg·hm-2	BR43	361.33±4.04Ba	418.33±Ca
T15	140kg·hm-2	BR43	336±3BCa	395.67±Dc
T16	0kg·hm-2	LK310	352±2.52Aa	375.33±Cd
T17	35kg·hm-2	LK310	364.66±3.51Cd	427±Aa
T18	70kg·hm-2	LK310	325±3Cc	335.33Dd
T19	105kg·hm-2	LK310	365.33±4.04BCa	419±Ba
T20	140kg·hm-2	LK310	356.33±2.562Bb	428.67Aa

## Sheet: soil TN
Treatment	Phosphorus supply intensity	Variety	Mean	SD	Mean	SD
			NS		NRS
T1	0kg·hm-2	KN18	1.45183	0.06431	1.17023	0.09094
T2	35kg·hm-2	KN18	1.43707	0.06545	1.1319	0.06692
T3	70kg·hm-2	KN18	1.45737	0.08217	1.0522	0.04835
T4	105kg·hm-2	KN18	1.4424	0.08408	1.1484	0.12239
T5	140kg·hm-2	KN18	1.63187	0.05184	1.44233	0.122
T6	0kg·hm-2	KN39	1.68907	0.13493	1.46773	0.06485
T7	35kg·hm-2	KN39	1.5842	0.03966	1.28677	0.04851
T8	70kg·hm-2	KN39	1.52033	0.04286	1.203	0.0833
T9	105kg·hm-2	KN39	1.8835	0.10708	1.68483	0.08198
T10	140kg·hm-2	KN39	1.8394	0.09437	1.60987	0.06566
T11	0kg·hm-2	BR43	1.71727	0.03125	1.3653	0.06098
T12	35kg·hm-2	BR43	1.76507	0.07839	1.39023	0.04113
T13	70kg·hm-2	BR43	2.34913	0.08827	1.95117	0.05384
T14	105kg·hm-2	BR43	2.23333	0.12839	1.88563	0.07494
T15	140kg·hm-2	BR43	1.69763	0.0619	1.28757	0.08195
T16	0kg·hm-2	LK310	1.71963	0.06448	1.3328	0.04113
T17	35kg·hm-2	LK310	2.26423	0.10247	1.856	0.07011
T18	70kg·hm-2	LK310	2.04563	0.1235	1.715	0.10307
T19	105kg·hm-2	LK310	1.63057	0.05455	1.1487	0.07027
T20	140kg·hm-2	LK310	1.6624	0.03681	1.27747	0.0403

## Sheet: soil TP
Treatment	Phosphorus supply intensity	Variety	Mean	SD	Mean	SD
			NS		NRS
T1	0kg·hm-2	KN18	6.26099	0.05644	6.4514	0.03716
T2	35kg·hm-2	KN18	6.37409	0.03103	6.55099	0.02778
T3	70kg·hm-2	KN18	6.42957	0.05315	6.62801	0.03398
T4	105kg·hm-2	KN18	6.68354	0.03105	6.92829	0.034
T5	140kg·hm-2	KN18	7.01743	0.071	7.46144	0.05482
T6	0kg·hm-2	KN39	6.30076	0.03992	6.49748	0.03722
T7	35kg·hm-2	KN39	6.42956	0.02784	6.54429	0.02771
T8	70kg·hm-2	KN39	6.47325	0.02826	6.68354	0.02782
T9	105kg·hm-2	KN39	6.75133	0.03437	6.94748	0.03086
T10	140kg·hm-2	KN39	7.06551	0.04634	7.5338	0.03436
T11	0kg·hm-2	BR43	6.41185	0.02164	6.57866	0.03398
T12	35kg·hm-2	BR43	6.48558	0.0185	6.63683	0.01886
T13	70kg·hm-2	BR43	6.55716	0.02784	6.737	0.02782
T14	105kg·hm-2	BR43	6.79668	0.02165	7.03399	0.03401
T15	140kg·hm-2	BR43	7.13848	0.02491	7.19787	0.02164
T16	0kg·hm-2	LK310	6.43445	0.03102	6.62434	0.0247
T17	35kg·hm-2	LK310	6.47424	0.01849	6.67581	0.02496
T18	70kg·hm-2	LK310	6.57643	0.02784	6.77407	0.03083
T19	105kg·hm-2	LK310	6.8104	0.02164	7.0207	0.02223
T20	140kg·hm-2	LK310	7.16376	0.02779	7.24639	0.03616

## Sheet: soil NH₄⁺
Treatment	Phosphorus supply intensity	Variety	Mean	SD	Mean	SD
			NS		NRS
T1	0kg·hm-2	KN18	40.9844	0.54031	41.5499	1.16324
T2	35kg·hm-2	KN18	47.7628	0.95143	48.3603	1.4949
T3	70kg·hm-2	KN18	53.6265	1.53102	54.0518	1.26299
T4	105kg·hm-2	KN18	58.2512	0.84171	58.8552	0.99108
T5	140kg·hm-2	KN18	54.7797	2.18111	54.9353	1.32014
T6	0kg·hm-2	KN39	41.9872	0.7401	42.3032	1.58847
T7	35kg·hm-2	KN39	47.9778	0.3781	48.8277	1.6931
T8	70kg·hm-2	KN39	55.2511	0.7285	55.7119	2.22447
T9	105kg·hm-2	KN39	58.6196	0.57352	59.3745	1.46371
T10	140kg·hm-2	KN39	55.6532	0.47407	56.2808	0.85521
T11	0kg·hm-2	BR43	38.1231	0.80589	38.7294	1.05439
T12	35kg·hm-2	BR43	40.3625	1.10706	40.8716	0.67602
T13	70kg·hm-2	BR43	45.1128	0.54817	45.5813	0.87039
T14	105kg·hm-2	BR43	42.5818	1.2036	43.2097	0.90199
T15	140kg·hm-2	BR43	40.8796	1.2152	41.559	0.46491
T16	0kg·hm-2	LK310	39.6185	0.76599	40.4526	1.3907
T17	35kg·hm-2	LK310	42.3	0.462	42.7246	0.58442
T18	70kg·hm-2	LK310	42.5287	0.49388	43.2524	0.35341
T19	105kg·hm-2	LK310	43.9679	0.89844	44.4765	1.3663
T20	140kg·hm-2	LK310	41.5936	0.56706	42.4465	0.53542

## Sheet: soil AP
Treatment	Phosphorus supply intensity	Variety	Mean	SD	Mean	SD
			NS		NRS
T1	0kg·hm-2	KN18	34.4516	1.0434	38.4476	1.22588
T2	35kg·hm-2	KN18	47.5667	1.26263	51.4476	0.90837
T3	70kg·hm-2	KN18	65.34	1.28526	70.5559	1.22657
T4	105kg·hm-2	KN18	73.3133	1.2127	80.6327	0.9984
T5	140kg·hm-2	KN18	83.9367	1.06519	88.4337	1.26744
T6	0kg·hm-2	KN39	36.4556	1.23997	42.9876	1.6455
T7	35kg·hm-2	KN39	48.4433	1.03196	52.0673	1.53162
T8	70kg·hm-2	KN39	68	1.30526	72.4973	1.61748
T9	105kg·hm-2	KN39	77.2333	1.39507	81.7667	2.76833
T10	140kg·hm-2	KN39	86.0167	1.73004	91.599	3.35974
T11	0kg·hm-2	BR43	10.3394	1.24789	13.9159	1.8059
T12	35kg·hm-2	BR43	14.7333	1.44535	19.9152	1.5126
T13	70kg·hm-2	BR43	23.22	2.32192	28.7415	1.70775
T14	105kg·hm-2	BR43	32.47	1.69222	36.2497	1.00307
T15	140kg·hm-2	BR43	50.6433	0.48521	56.2741	1.09935
T16	0kg·hm-2	LK310	13.8431	1.62004	17.9826	1.51938
T17	35kg·hm-2	LK310	20.0433	2.135	26.1487	1.55239
T18	70kg·hm-2	LK310	36.67	0.84788	40.5573	1.03721
T19	105kg·hm-2	LK310	45.0333	2.09166	51.1055	0.94302
T20	140kg·hm-2	LK310	54.68	2.20536	57.8104	1.00413

## Sheet: NO3--N
Treatment	Phosphorus supply intensity	Variety	Mean	SD	Mean	SD
			NS		NRS
T1	0kg·hm-2	KN18	12.0004	0.29789	10.8882	0.33773
T2	35kg·hm-2	KN18	15.9895	0.7177	13.9948	0.43333
T3	70kg·hm-2	KN18	17.5357	0.39641	16.2992	0.20038
T4	105kg·hm-2	KN18	18.5576	0.45877	17.2778	0.30712
T5	140kg·hm-2	KN18	20.5353	0.34714	18.5545	0.18333
T6	0kg·hm-2	KN39	14.847	0.37255	12.4957	0.34162
T7	35kg·hm-2	KN39	15.7811	0.44733	13.6273	0.47911
T8	70kg·hm-2	KN39	16.6026	0.47442	14.643	0.236
T9	105kg·hm-2	KN39	17.6624	0.57301	14.8941	0.27388
T10	140kg·hm-2	KN39	19.6478	0.60419	18.5923	0.34851
T11	0kg·hm-2	BR43	10.8139	0.46461	9.45473	0.66448
T12	35kg·hm-2	BR43	12.4661	0.47834	10.6003	0.2593
T13	70kg·hm-2	BR43	13.7741	0.44508	12.293	0.62395
T14	105kg·hm-2	BR43	15.888	0.30564	14.5305	0.39928
T15	140kg·hm-2	BR43	18.5194	0.47379	16.2081	0.32522
T16	0kg·hm-2	LK310	9.413	0.39872	5.78252	0.23624
T17	35kg·hm-2	LK310	11.4275	0.26251	10.5867	0.37447
T18	70kg·hm-2	LK310	14.5691	0.4065	13.7381	0.50692
T19	105kg·hm-2	LK310	15.7672	0.44916	14.6867	0.4155
T20	140kg·hm-2	LK310	17.6533	0.52006	15.7556	0.44438
