# Supplementary material for: Regulatory mechanism of phosphorus supply intensity on the plant nitrogen acquisition in soybean: Insight from the differences of rhizobia diversity between high-oil soybean and non-high-oil soybean
Source: Research Square preprint supplement (doi:10.21203/rs.3.rs-8195203/v1), 2025-12-16
Supplement: Supplementary file 2 [file b7c442dea521fcc5482395d5.docx]

| Processing group | Variety | Phosphorus supply intensity(kg·hm-2) |
| --- | --- | --- |
|
| T1 | KN18 | 0 |
| T2 | KN18 | 35 |
| T3 | KN18 | 70 |
| T4 | KN18 | 105 |
| T5 | KN18 | 140 |
| T6 | KN39 | 0 |
| T7 | KN39 | 35 |
| T8 | KN39 | 70 |
| T9 | KN39 | 105 |
| T10 | KN39 | 140 |
| T11 | BR43 | 0 |
| T12 | BR43 | 35 |
| T13 | BR43 | 70 |
| T14 | BR43 | 105 |
| T15 | BR43 | 140 |
| T16 | LK310 | 0 |
| T17 | LK310 | 35 |
| T18 | LK310 | 70 |
| T19 | LK310 | 105 |
| T20 | LK310 | 140 |

Table 1.Experimental design
