# Supplementary material for: Regulatory mechanism of phosphorus supply intensity on the plant nitrogen acquisition in soybean: Insight from the differences of rhizobia diversity between high-oil soybean and non-high-oil soybean
Source: Research Square preprint supplement (doi:10.21203/rs.3.rs-8195203/v1), 2025-12-16
Supplement: Supplementary file 3 [file d0686fa5efa05103e7d2befb.docx]

Table 2 Physicochemical properties of tested soil in pot experiment

| pH | EC (μS·cm-1) | Total nitrogen (g·kg-1) | Organic matter (g·kg-1) | Available Phosphorus (mg·kg-1) |
| --- | --- | --- | --- | --- |
| 6.73 | 420.17 | 1.27 | 25.47 | 33.41 |
