# Supplementary figures and images for: Regulatory mechanism of phosphorus supply intensity on the plant nitrogen acquisition in soybean: Insight from the differences of rhizobia diversity between high-oil soybean and non-high-oil soybean
Source: Research Square preprint supplement (doi:10.21203/rs.3.rs-8195203/v1), 2025-12-16

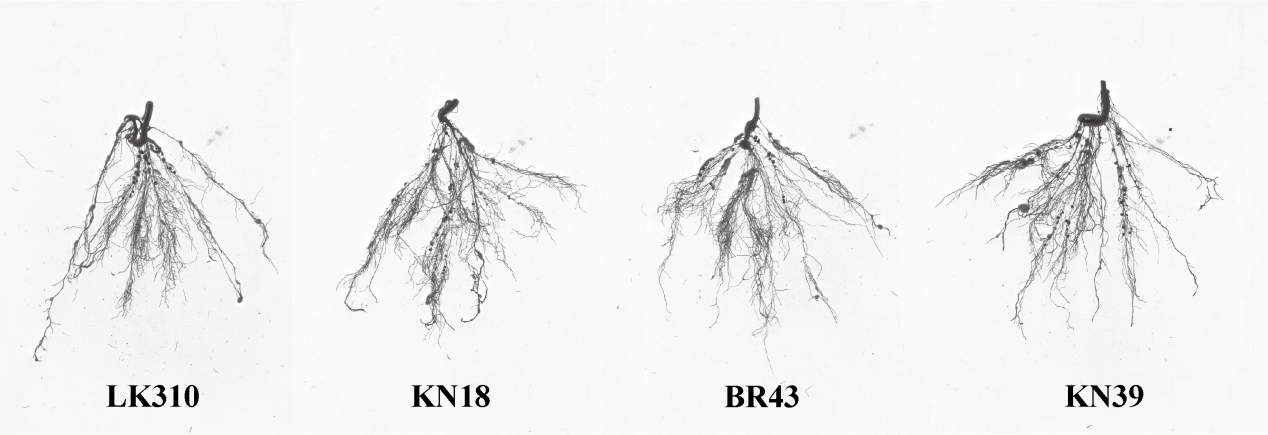


Fig.2 Phenotypic changes of soybean seedlings at 105 kg·hm⁻² phosphorus supply intensity .

Supplement: Supplementary file 4 [file fdcec41edc0f3e46bd5ebdc3.docx]
